# Supplementary material for: Mesoscale modelling of North Sea wind resources with COSMO-CLM: model evaluation and impact assessment of future wind farm characteristics on cluster-scale wake losses
Source: Copernicus journal article supplement (doi:10.5194/wes-9-697-2024), 2024-03-20
Supplement: Supplementary file 1 [file wes-9-697-2024-supplement.pdf]

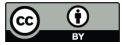

*Supplement of*

**Mesoscale modelling of North Sea wind resources  
with COSMO-CLM: model evaluation and  
impact assessment of future wind farm  
characteristics on cluster-scale wake losses**

**Ruben Borgers et al.**

*Correspondence to:* Ruben Borgers ([ruben.borgers@kuleuven.be](mailto:ruben.borgers@kuleuven.be))

The copyright of individual parts of the supplement might differ from the article licence.

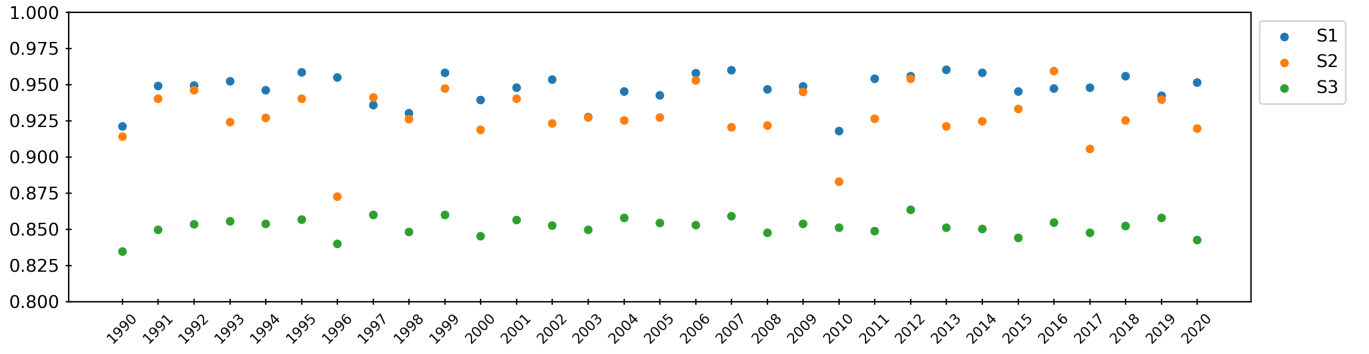

Figure S1: Median S1, S2 and S3 scores over the considered North Sea grid cells for year (1990-2020). Higher values correspond to a larger overlap between the single-year and multi-year histograms.

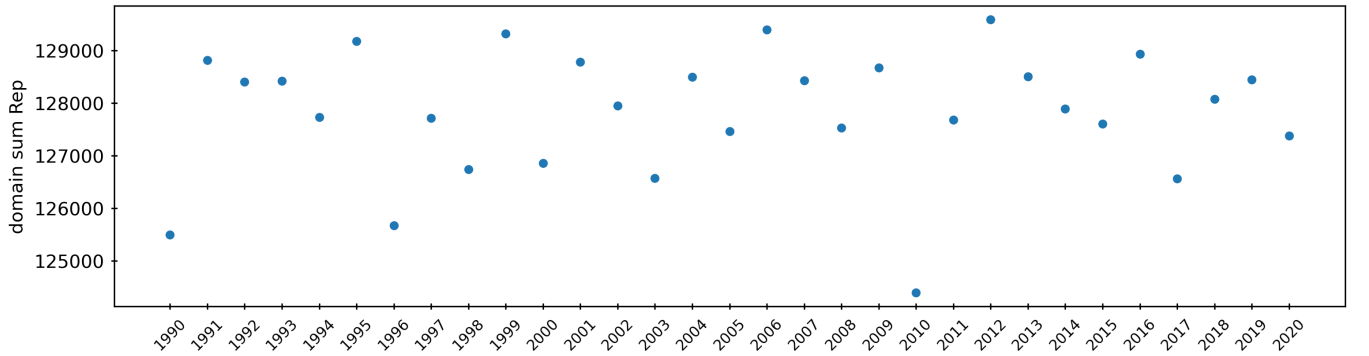

Figure S2: Final representativeness value for each year (1990-2020).

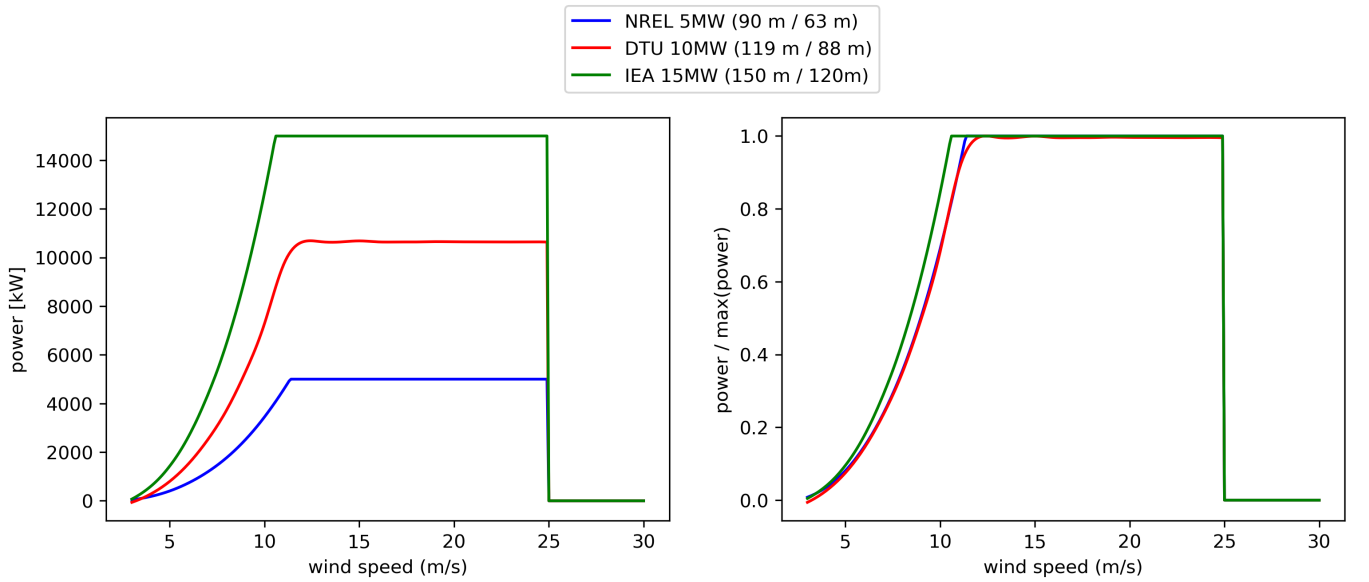

Figure S3: Left: power curves of the three reference turbines employed in this study. Right: same as left, but the power curves are normalized by the maximum power output.

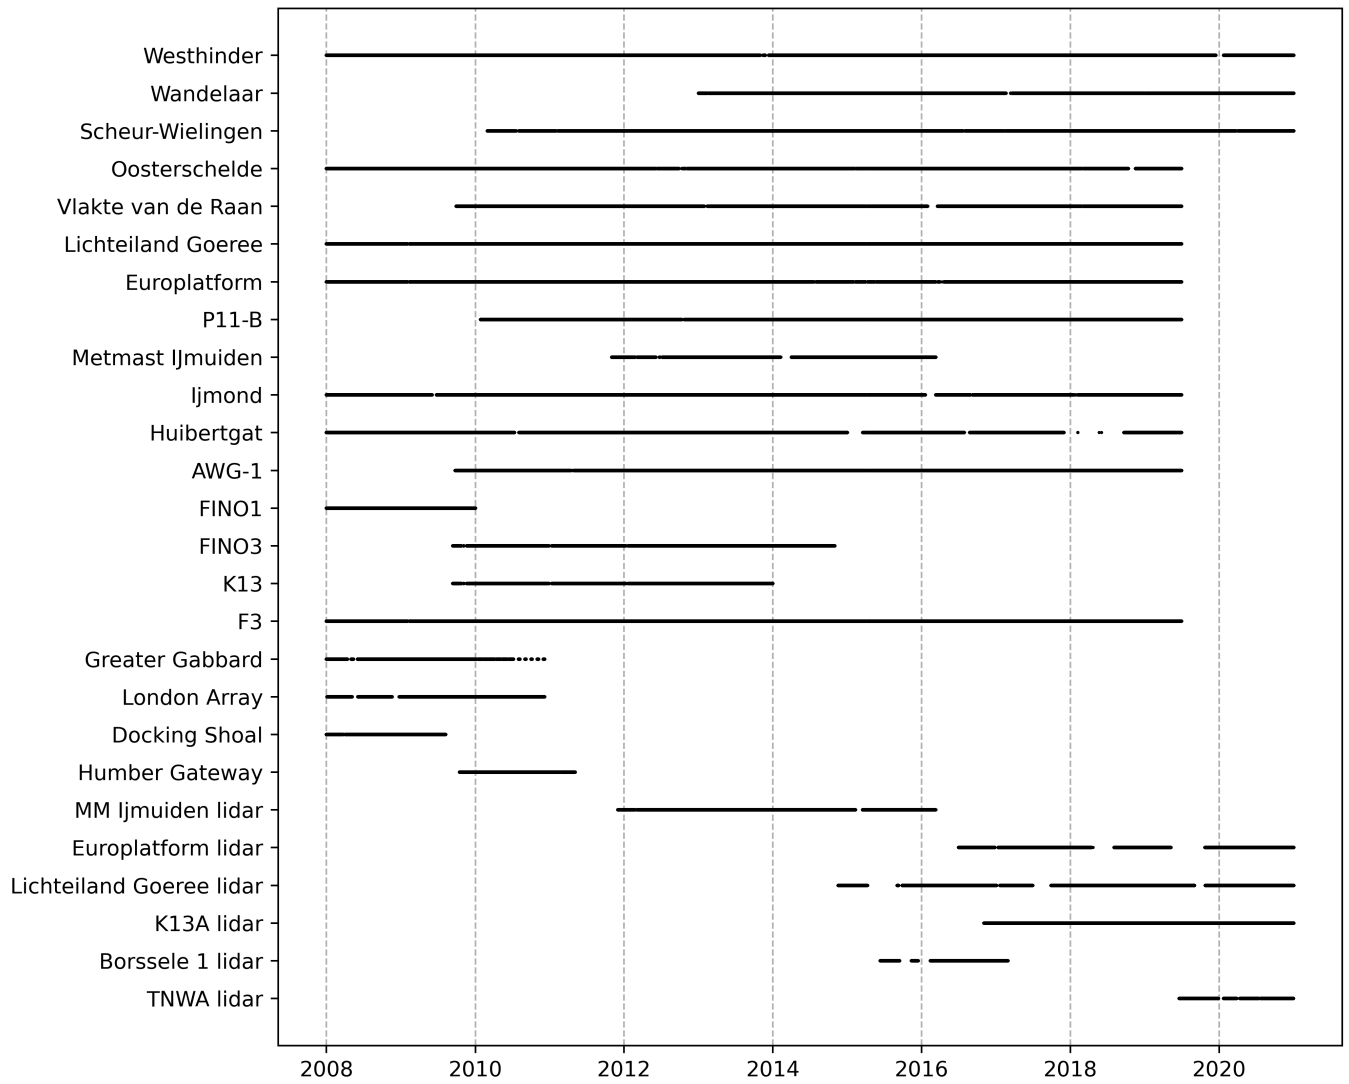

Figure S4: Temporal coverage of the different measurement datasets.

| Station | wind farms                                          | filtering                                              |
|---------|-----------------------------------------------------|--------------------------------------------------------|
| FINO1   | Alpha Ventus                                        | omission after July 2009                               |
| FINO3   | Dantysk, Sandbank                                   | omission after November 2014                           |
| WH      | Belgian offshore cluster                            | removed [27°, 77°]                                     |
| WA      | Belgian offshore cluster                            | removed [325°, 15°]                                    |
| SW      | Belgian offshore cluster                            | removed [287°, 341°]                                   |
| BO      | Belgian offshore cluster                            | removed [150°, 300°]                                   |
| OS      | Belgian offshore cluster                            | removed [243°, 255°]                                   |
| EPL     | Belgian offshore cluster                            | removed [202°, 228°]                                   |
| VVDR    | Belgian offshore cluster                            | removed [243°, 255°]                                   |
| IJM     | Eneco Luchterduinen, Prinses Amalia, Egmond aan Zee | removed [249°, 261°] and [300°, 311°] and [330°, 348°] |
| AWG1    | Riffgat                                             | removed [55°, 59°]                                     |
| HGT     | Riffgat                                             | removed [0°, 36°]                                      |
| TNW     | Gemini, Deutsche bucht, Veja Mate, Bard Offshore 1  | removed [27°, 93°]                                     |
| LA      | Gunfleet Sands, Thanet wind farm                    | removed [130°, 145°] and [308°, 340°]                  |

Table S1: Description of the measurement filtering for the presence of wind farms.

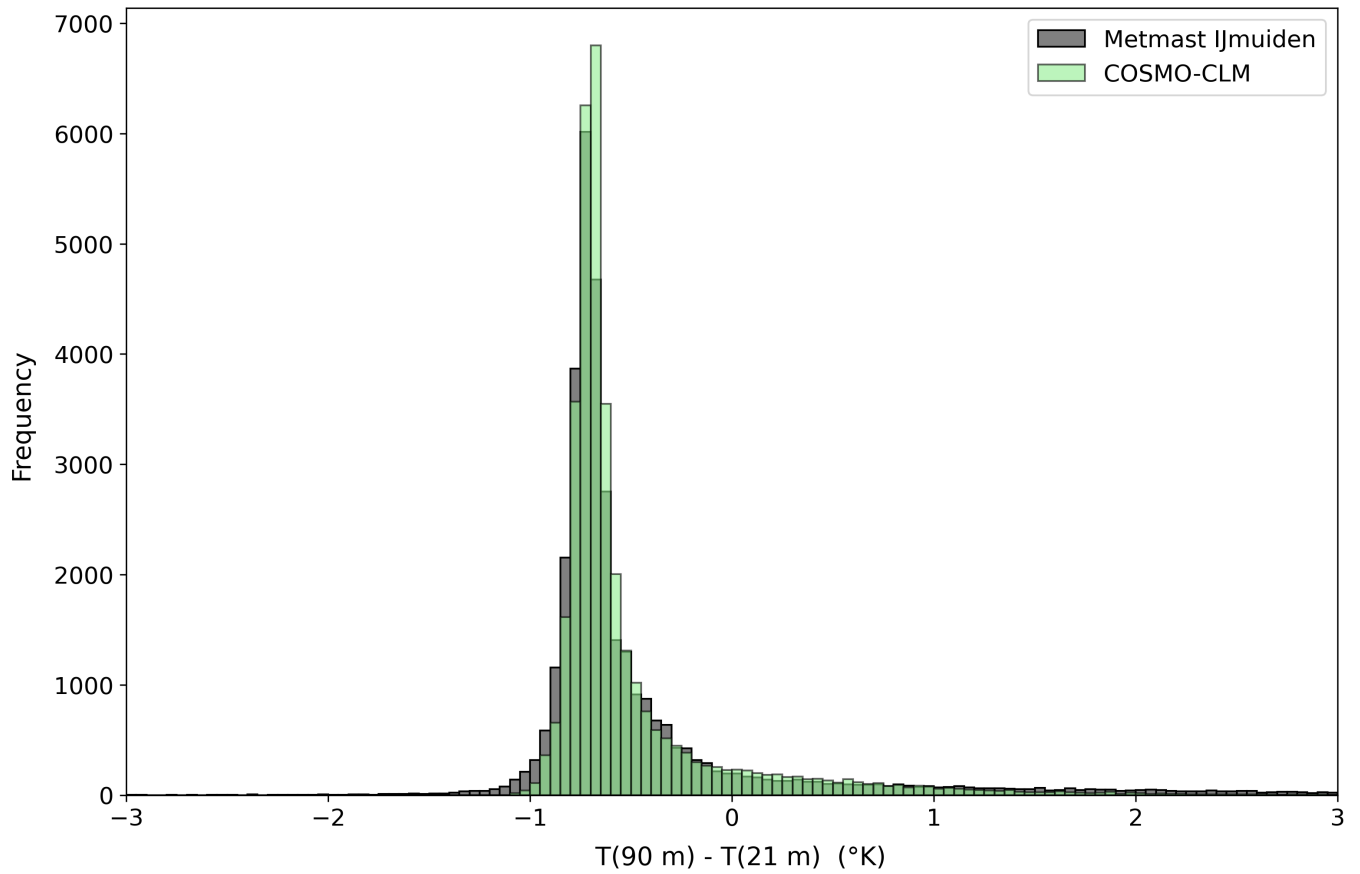

Figure S5: Histograms of the instantaneous temperature gradient between 90 m MSL and 21 m MSL based on 10-minute data for the period 2012-2015 at the location of measurement mast IJmuiden (MMIJ). Lightgreen: only COSMO-CLM; Grey: only the measurements; Green: overlap between the histograms.

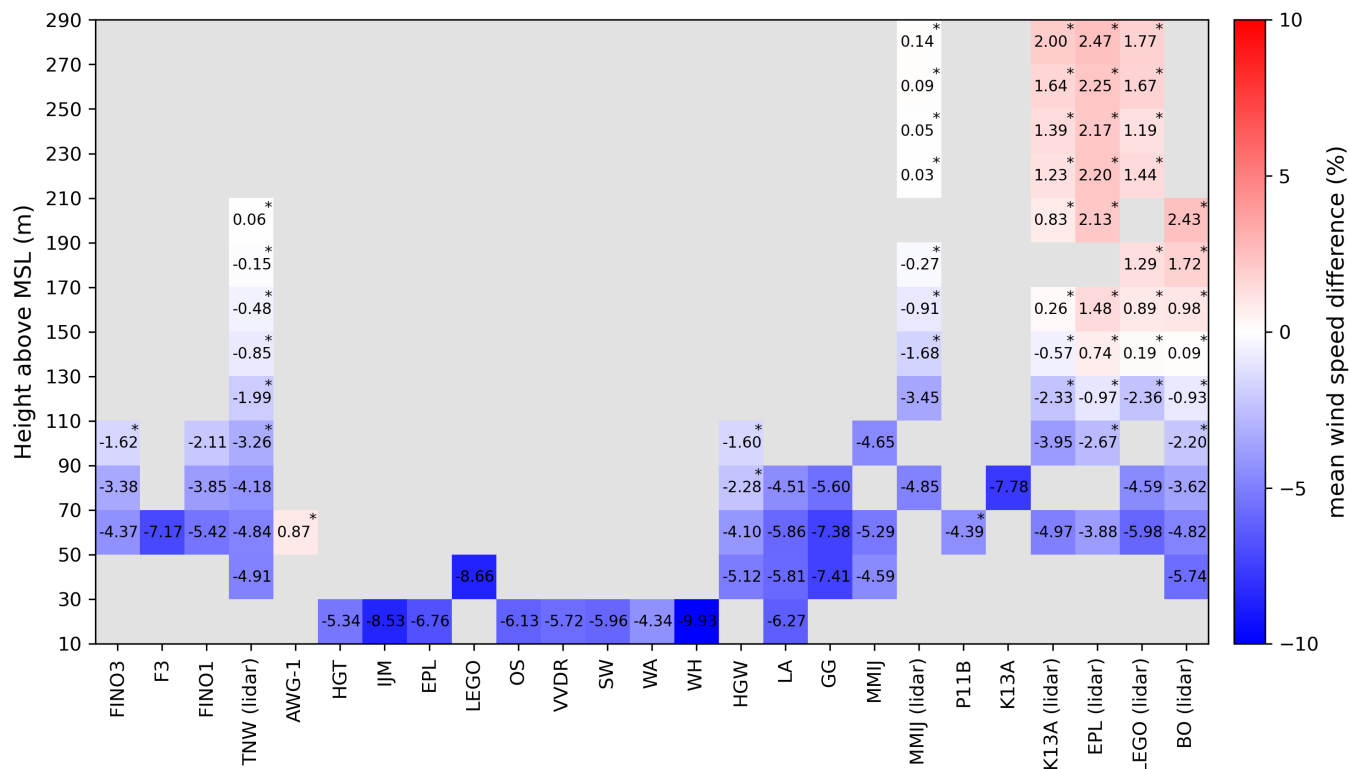

Figure S6: Wind speed bias (%) for the complete time period of the measurement data. This concerns measurements between 10 and 290 meters to MSL. The vertical range is subdivided into 20 meter intervals for readability. The presence of an asterisk indicates that the bias is within the measurement uncertainty. Stations are clustered per region.

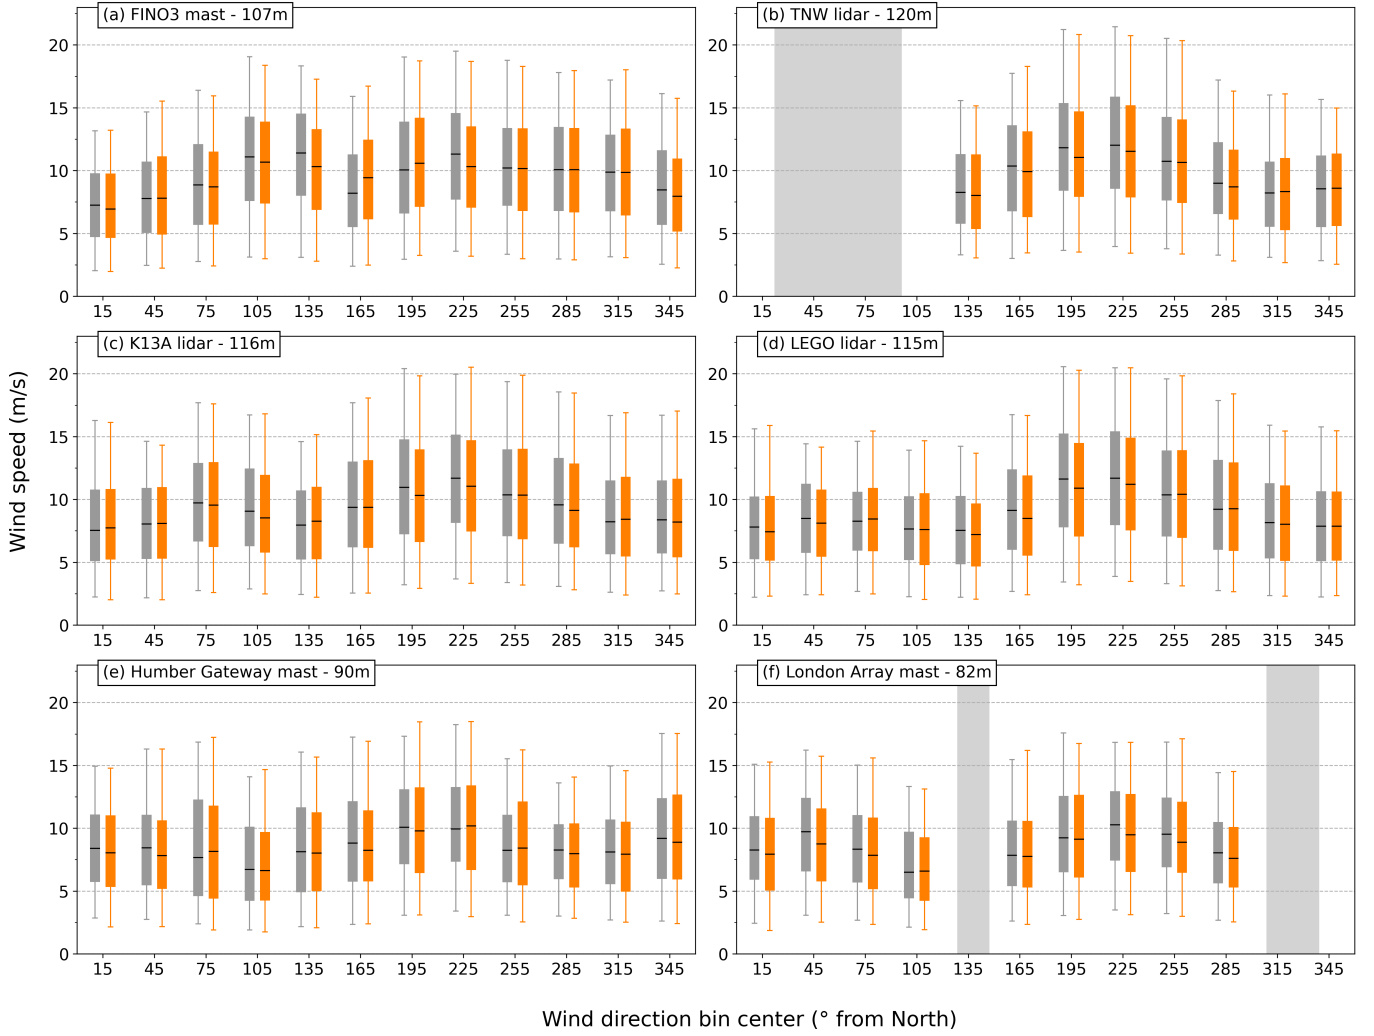

Figure S7: Boxplots representing the wind speed distribution per 30° wind direction bin for the observations (grey) and the model (orange). Shown for the three masts and three lidar stations at turbine hub height. The box corresponds to the Q25-Q50-Q75 wind speeds. The lower and upper whisker are the Q5 and the Q95 percentiles, respectively. Lightgrey shaded regions correspond to sectors that were filtered out due to the presence of wind farms within a distance of 50km.

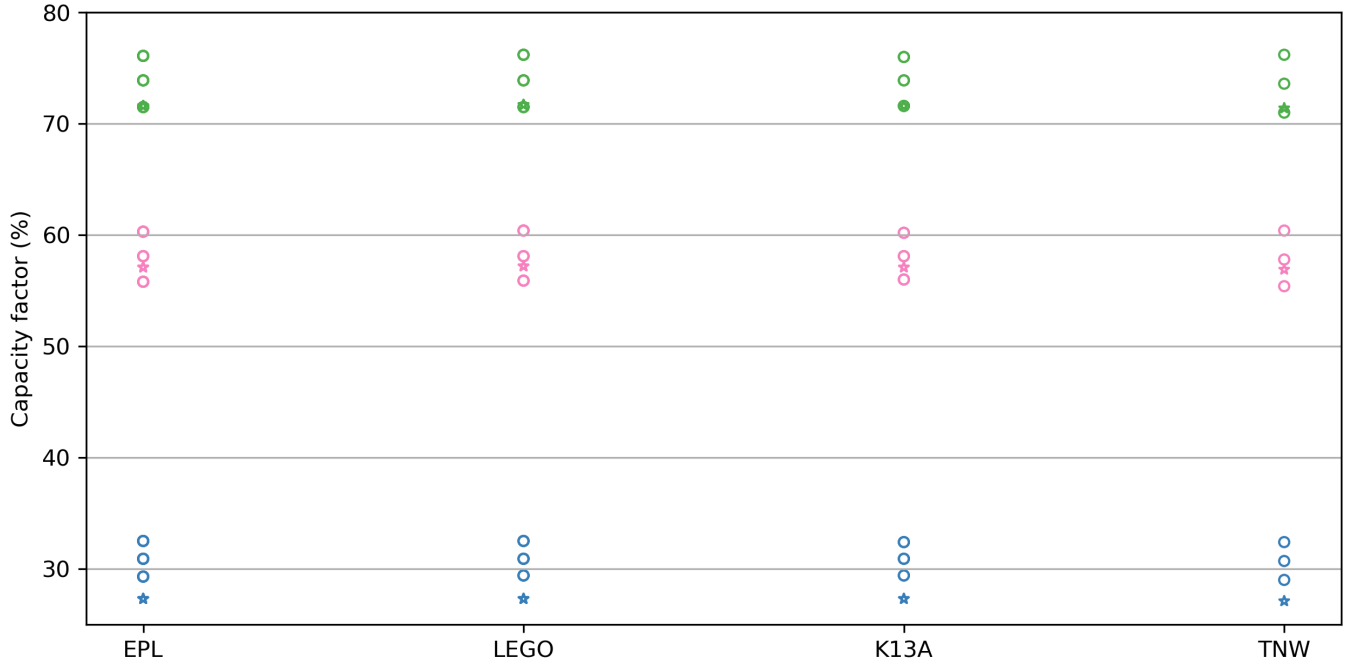

Figure S8: Capacity factor values (%) inferred from the wind speed distributions under different stability conditions for lidar observations (hollow circles) and the corresponding model grid cell (asterisk). The stability classes are unstable (pink), weakly stable (green) and stable (blue). For the observations, upper and lower uncertainty bounds on the capacity factor are provided based on the wind speed uncertainty.

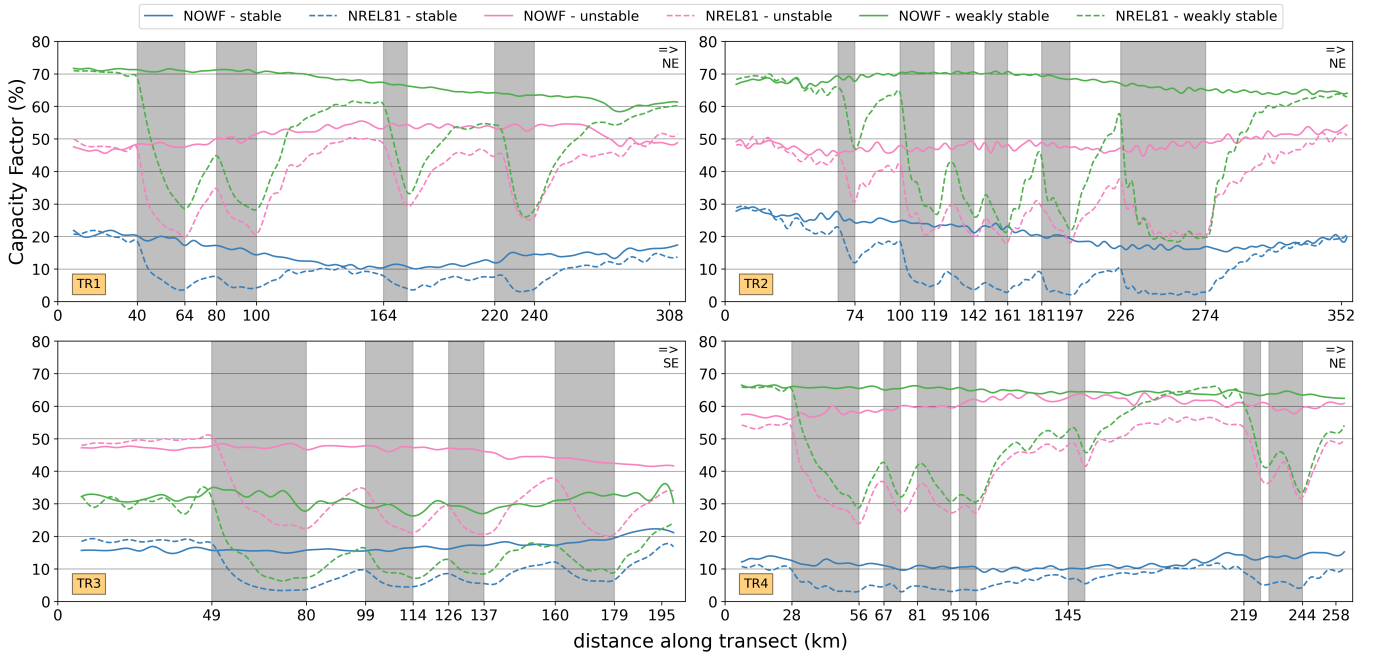

Figure S9: 2016 capacity factor transects for the four lines indicated on Fig. 1. for the NOWF (full line) and NREL81 (dashed line) scenario at 90 m height, subdivided in the three dynamic stability classes: unstable (pink), weakly stable (green) and stable (blue). The X-axis is in km. Wind data is only considered when the wind direction deviates within  $\pm 15^\circ$  from the transect orientation (W to E) at the middle grid cell of each transect. Grey shadings represent wind farm locations.
